# Supplementary material for: Bone Status in Obese, Non-diabetic, Antipsychotic-Treated Patients, and Effects of the Glucagon-Like Peptide-1 Receptor Agonist Exenatide on Bone Turnover Markers and Bone Mineral Density
Source: PubMed Central journal article supplement (PMC6360839; doi:10.3389/fpsyt.2018.00781), 2019-01-28
Supplement: Image_1.pdf [file Image_1.pdf]

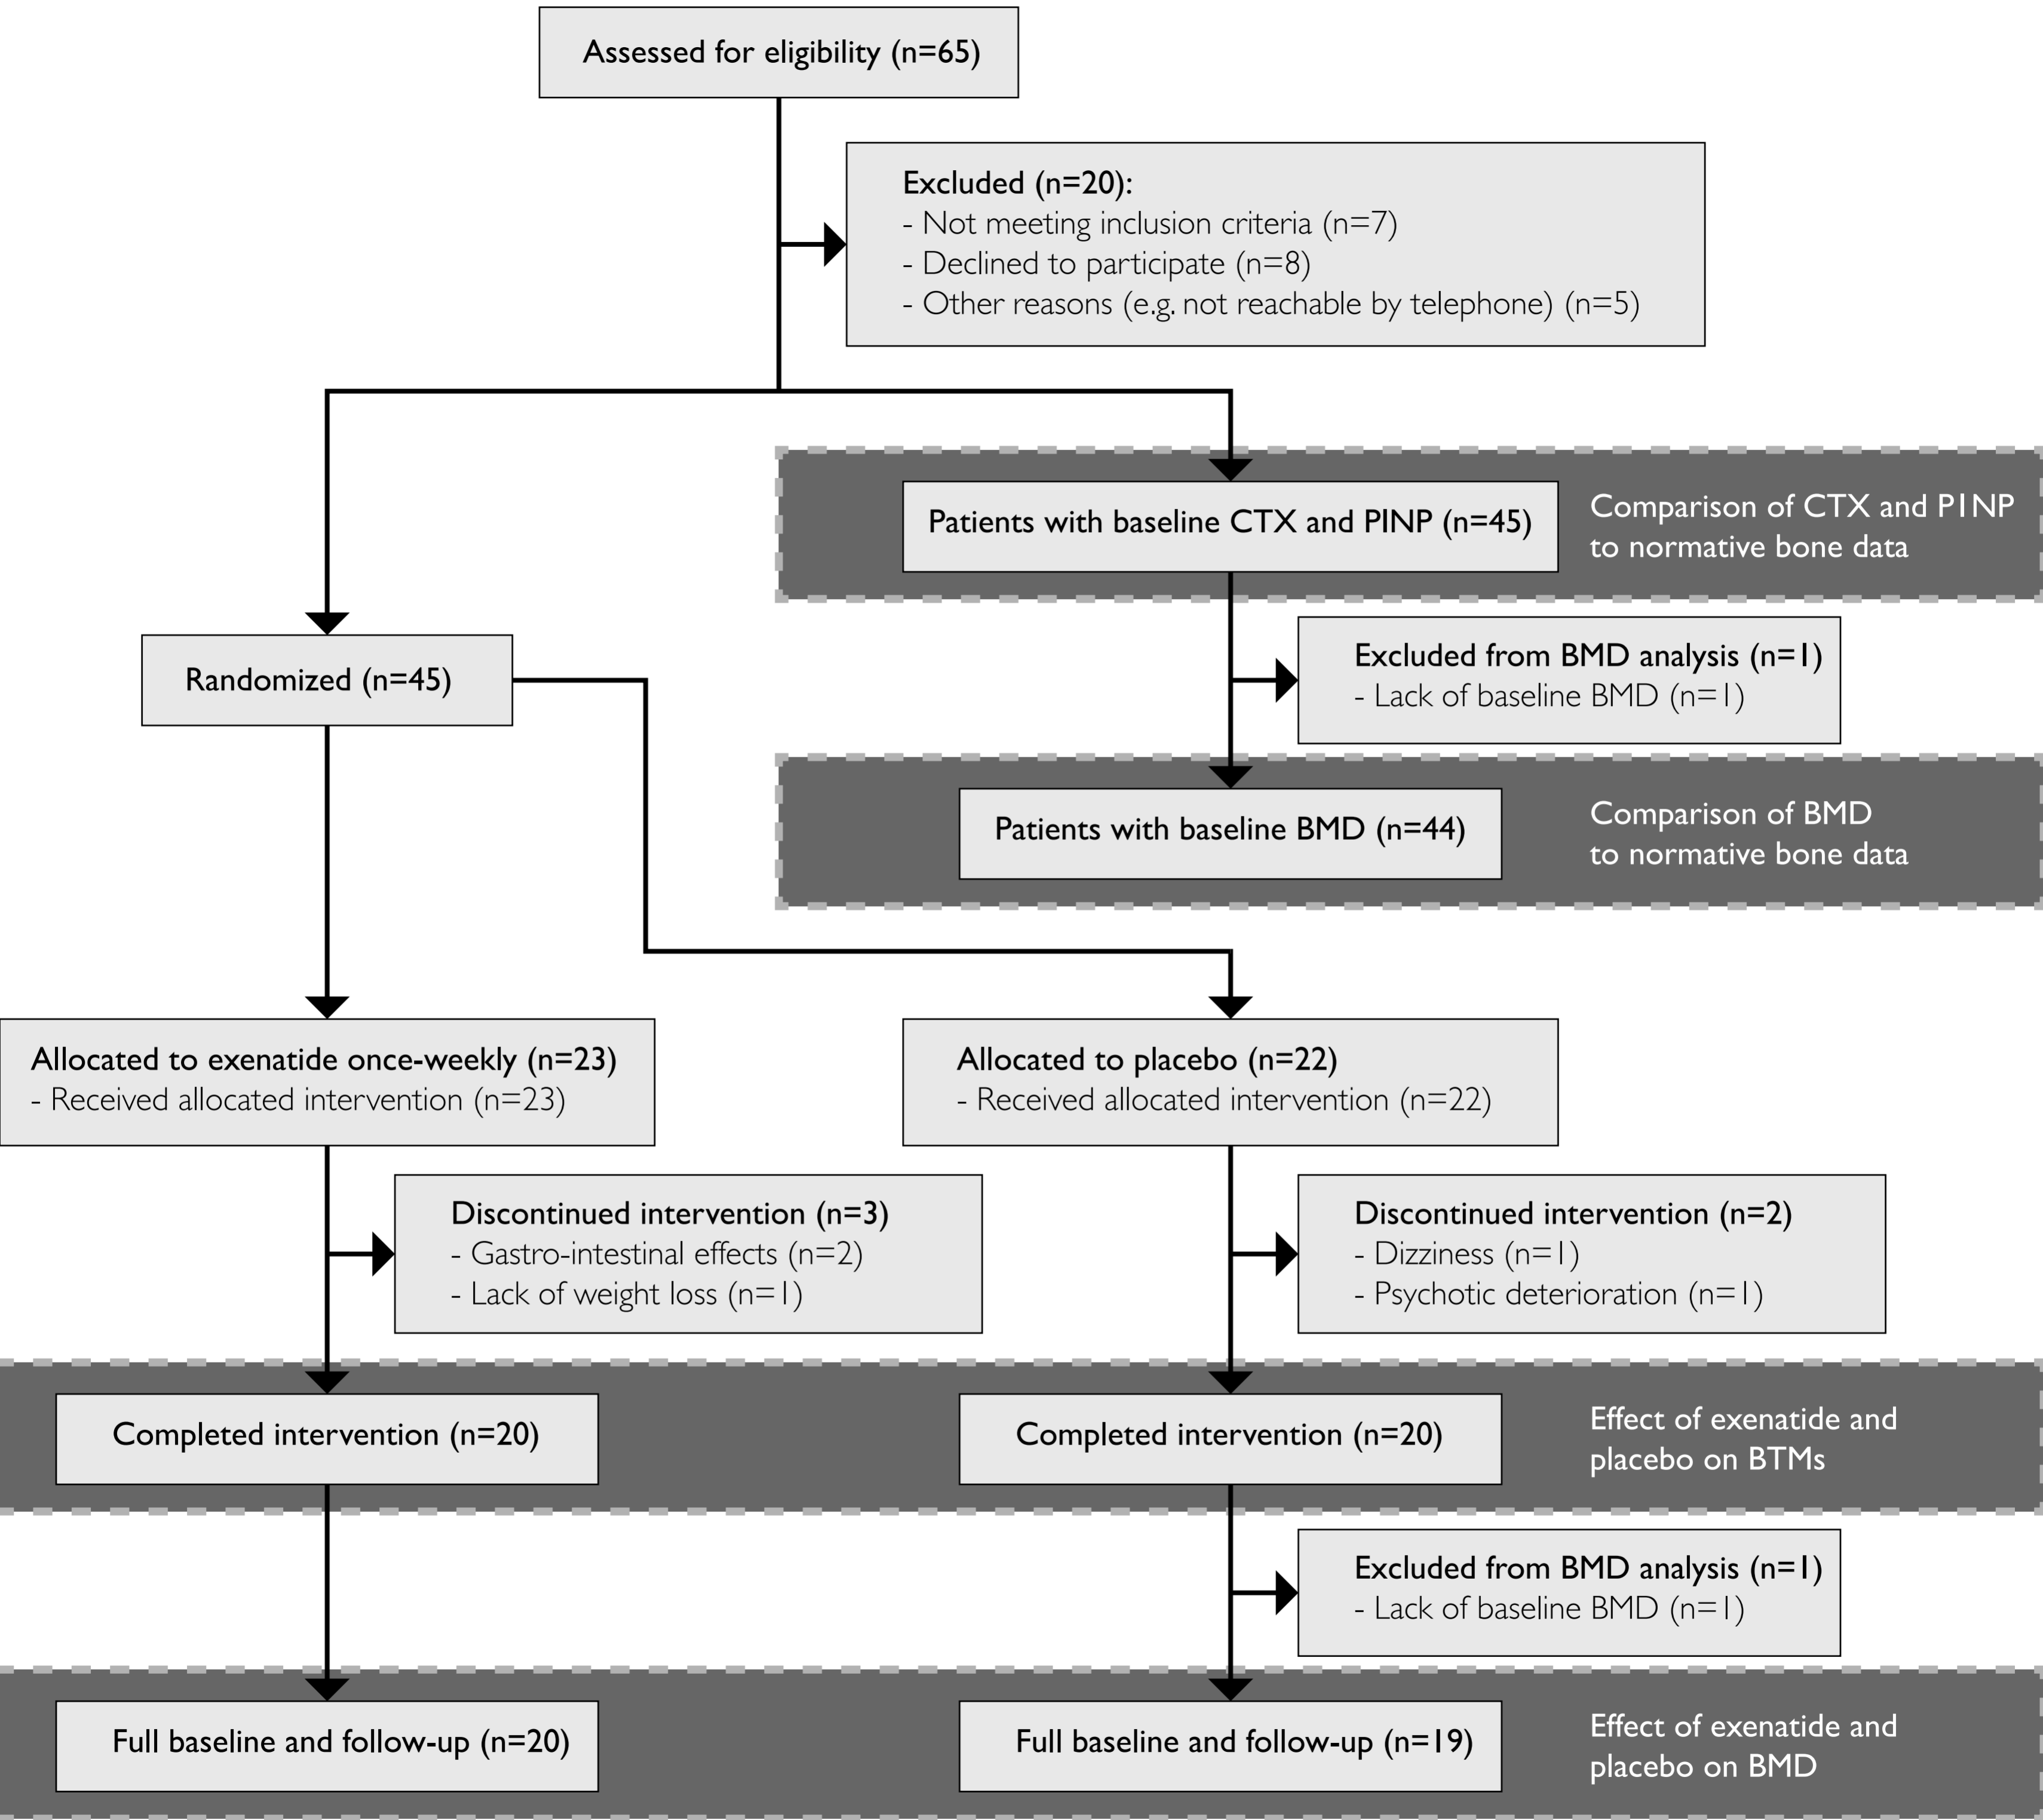

Supplementary Figure I. CONSORT flowchart of the trial.
