# Supplementary material for: Bone Status in Obese, Non-diabetic, Antipsychotic-Treated Patients, and Effects of the Glucagon-Like Peptide-1 Receptor Agonist Exenatide on Bone Turnover Markers and Bone Mineral Density
Source: PubMed Central journal article supplement (PMC6360839; doi:10.3389/fpsyt.2018.00781), 2019-01-28
Supplement: Table_1.pdf [file Table_1.pdf]

**Supplementary Table 1.** Demographic and clinical characteristics of the patients at baseline.

|                                                     | <b>Exenatide (n=23)</b>   | <b>Placebo (n=22)</b>     | <b>p-value</b> |
|-----------------------------------------------------|---------------------------|---------------------------|----------------|
| <b>Age (year) – mean ± SD [range]</b>               | 37.1 ± 10.6 [19-65]       | 34.5 ± 10.1 [19-56]       | 0.40           |
| <b>Sex (male / female) – no. (%)</b>                | 11 (48) / 12 (52)         | 10 (45) / 12 (55)         | 0.87           |
| <b>Ethnicity (caucasian / mongolian) – no. (%)</b>  | 21 (91) / 2 (9)           | 19 (86) / 3 (14)          | 0.60           |
| <b>Illness duration (weeks) – mean ± SD [range]</b> | 689 ± 463 [38-1404]#      | 578 ± 426 [26-1404]       | 0.41           |
| <b>Education (years) – mean ± SD [range]</b>        | 12.6 ± 2.9 [8-18]         | 12.1 ± 2.6 [7-20]         | 0.51           |
| <b>Current smoker – no. (%)</b>                     | 7 (30)                    | 1 (5)                     | 0.02           |
| <b>Body weight (kg) – mean ± SD [range]</b>         | 117.1 ± 16.7 [84.4-150.7] | 110.6 ± 17.7 [88.2-149.7] | 0.21           |
| <b>BMI (kg/m<sup>2</sup>) – mean ± SD [range]</b>   | 39.2 ± 3.8 [31.0-48.0]    | 38.4 ± 6.1 [30.1-55.1]    | 0.59           |
| <b>Diagnosis</b>                                    |                           |                           |                |
| <b>Schizophrenia, F20.X – no. (%)</b>               | 21 (91)                   | 20 (91)                   | -              |
| <b>Schizoaffective disorders, F25.X – no. (%)</b>   | 2 (9)                     | 2 (9)                     |                |
| <b>Antipsychotic medication</b>                     |                           |                           |                |
| <b>Typical monotherapy – no. (%)</b>                | 1 (4)                     | 1 (5)                     | 0.97           |
| <b>Atypical monotherapy – no. (%)</b>               | 15 (65)                   | 11 (50)                   | 0.30           |
| <b>Polypharmacy – no. (%)</b>                       | 7 (30)                    | 10 (45)                   | 0.30           |

# One observation missing.
